# Supplementary material for: Characterization of Enlarged Tongues in Cloned Piglets
Source: MDPI journal article supplement (doi:10.3390/cimb45110571), 2023-11-14
Supplement: s1 [file s1]

**Table S6.** Analysis of enriched KEGG pathway for DEGs.

| GO term  | Description                             | Fold change | enrichment FDR |
|----------|-----------------------------------------|-------------|----------------|
| ssc00030 | Pentose phosphate pathway               | 12.75       | 9.1.E-04       |
| ssc00010 | Glycolysis / Gluconeogenesis            | 9.52        | 8.5.E-05       |
| ssc04922 | Glucagon signaling pathway              | 8.83        | 1.6.E-06       |
| ssc04612 | Antigen processing and presentation     | 8.74        | 1.1.E-03       |
| ssc00330 | Arginine and proline metabolism         | 8.57        | 1.2.E-03       |
| ssc05134 | Legionellosis                           | 8.08        | 1.4.E-03       |
| ssc04066 | HIF-1 signaling pathway                 | 7.93        | 2.7.E-06       |
| ssc04924 | Renin secretion                         | 7.57        | 9.1.E-04       |
| ssc05410 | Hypertrophic cardiomyopathy             | 7.47        | 1.3.E-04       |
| ssc01230 | Biosynthesis of amino acids             | 7.04        | 1.1.E-03       |
| ssc04152 | AMPK signaling pathway                  | 6.71        | 4.4.E-05       |
| ssc04260 | Cardiac muscle contraction              | 6.33        | 1.6.E-03       |
| ssc01200 | Carbon metabolism                       | 5.84        | 6.9.E-04       |
| ssc04024 | CAMP signaling pathway                  | 5.78        | 1.6.E-06       |
| ssc04910 | Insulin signaling pathway               | 5.37        | 5.7.E-04       |
| ssc05418 | Fluid shear stress and atherosclerosis  | 4.98        | 1.3.E-03       |
| ssc04630 | JAK-STAT signaling pathway              | 4.73        | 1.1.E-03       |
| ssc05417 | Lipid and atherosclerosis               | 4.11        | 1.3.E-03       |
| ssc04080 | Neuroactive ligand-receptor interaction | 3.58        | 4.2.E-04       |
| ssc01100 | Metabolic pathways                      | 2.35        | 2.7.E-06       |
