# Supplementary material for: Characterization of Enlarged Tongues in Cloned Piglets
Source: MDPI journal article supplement (doi:10.3390/cimb45110571), 2023-11-14
Supplement: s1 [file s1]

**Table S1.** List of primer sequences for PCR

| Name primer           | Sequences (5' → 3')             | Expected size |
|-----------------------|---------------------------------|---------------|
| pWAP 5` & EF1-Neo/GFP | F: CATCTGGGGTCTATCCAAGC         | 2.4kb         |
|                       | R: CACGGCGACTACTGCACTTA         |               |
| pWAP 5` & pWAP 3`     | F: GATGGGAAGAAGTGAGGGGCTCTGTGTC | 6.6kb         |
|                       | R: GGTACACAGGGGCTAATAGGCAGTCGAG |               |
| <i>β-actin</i>        | F: GGACTTCGAGCAGGAGATGG         | 0.3kb         |
|                       | R: GCACCGTGTTGGCGTAGAGG         |               |
