# Supplementary material for: Characterization of Enlarged Tongues in Cloned Piglets
Source: MDPI journal article supplement (doi:10.3390/cimb45110571), 2023-11-14
Supplement: s1 [file s1]

**Table S2.** Microsatellite analysis of surrogate, donor cell and offspring.

[illegible]
