# Supplementary material for: Characterization of Enlarged Tongues in Cloned Piglets
Source: MDPI journal article supplement (doi:10.3390/cimb45110571), 2023-11-14
Supplement: s1 [file s1]

**Table S3.** Upregulated DEGs between wild type and cloned piglets.

| Gene symbol     | GenBank accession number | Fold change | <i>P</i> -value | <i>FDR</i> correction <i>p</i> -value |
|-----------------|--------------------------|-------------|-----------------|---------------------------------------|
| <i>NR4A3</i>    | NM_214247                | 12.83       | 1.11E-21        | 2.19E-19                              |
| <i>PTX3</i>     | NM_001244783             | 12.68       | 3.60E-17        | 4.21E-15                              |
| <i>CITED1</i>   | NM_001037964             | 8.04        | 3.11E-11        | 1.30E-09                              |
| <i>KLF15</i>    | NM_001134349             | 6.71        | 2.04E-17        | 2.57E-15                              |
| <i>FOS</i>      | NM_001123113             | 6.06        | 7.08E-15        | 5.59E-13                              |
| <i>HSPA6</i>    | NM_001123127             | 5.80        | 1.44E-09        | 3.86E-08                              |
| <i>CSF3</i>     | NM_213842                | 5.66        | 9.00E-11        | 3.35E-09                              |
| <i>ACTC1</i>    | NM_001170517             | 5.44        | 1.15E-15        | 1.04E-13                              |
| <i>FBXO32</i>   | NM_001044588             | 5.09        | 9.72E-11        | 3.53E-09                              |
| <i>GADD45A</i>  | NM_001044599             | 5.02        | 1.49E-24        | 3.93E-22                              |
| <i>PTGS2</i>    | NM_214321                | 4.91        | 5.89E-13        | 3.65E-11                              |
| <i>STC1</i>     | NM_001103212             | 4.89        | 7.39E-35        | 5.84E-32                              |
| <i>MYOZ2</i>    | NM_001044593             | 4.85        | 3.40E-17        | 4.14E-15                              |
| <i>PLAGL1</i>   | NM_001044545             | 4.62        | 2.85E-09        | 7.19E-08                              |
| <i>MSI1</i>     | NM_001315570             | 4.55        | 6.65E-10        | 1.95E-08                              |
| <i>SFRP2</i>    | NM_001244395             | 4.51        | 4.48E-09        | 1.05E-07                              |
| <i>PNMT</i>     | NM_001123164             | 4.30        | 4.86E-16        | 4.96E-14                              |
| <i>AMZ1</i>     | NM_001195325             | 4.24        | 1.11E-07        | 1.87E-06                              |
| <i>CXCL2</i>    | NM_001001861             | 4.15        | 2.13E-05        | 1.91E-04                              |
| <i>AWN</i>      | NM_213829                | 4.14        | 8.63E-06        | 9.00E-05                              |
| <i>LEPR</i>     | NM_001024587             | 4.11        | 1.71E-07        | 2.74E-06                              |
| <i>SOCS3</i>    | NM_001123196             | 4.08        | 1.38E-11        | 6.33E-10                              |
| <i>PPARGC1A</i> | NM_213963                | 3.97        | 4.70E-06        | 5.36E-05                              |
| <i>BHLHE40</i>  | NM_001245010             | 3.90        | 8.90E-34        | 5.63E-31                              |
| <i>RBP5</i>     | NM_001145223             | 3.84        | 7.04E-08        | 1.26E-06                              |
| <i>ADORA3</i>   | NM_001243435             | 3.80        | 3.70E-09        | 8.95E-08                              |
| <i>CCL26</i>    | NM_001078665             | 3.79        | 1.00E-05        | 1.01E-04                              |
| <i>FKBP5</i>    | NM_001315611             | 3.77        | 6.70E-31        | 3.53E-28                              |
| <i>SERPINE1</i> | NM_213910                | 3.76        | 6.00E-08        | 1.10E-06                              |
| <i>CCR7</i>     | NM_001001532             | 3.74        | 1.15E-04        | 8.09E-04                              |
| <i>RGS2</i>     | NM_001044600             | 3.69        | 9.37E-11        | 3.44E-09                              |
| <i>SLC5A4</i>   | NM_214182                | 3.65        | 5.38E-08        | 1.00E-06                              |
| <i>HMOX2</i>    | NM_001244412             | 3.58        | 1.12E-15        | 1.04E-13                              |
| <i>GPR84</i>    | NM_001258301             | 3.51        | 2.03E-04        | 1.33E-03                              |
| <i>CATSPER4</i> | NM_001244280             | 3.50        | 1.09E-08        | 2.30E-07                              |
| <i>HAPLN1</i>   | NM_001004028             | 3.47        | 2.90E-06        | 3.47E-05                              |
| <i>ULBP1</i>    | NM_001004035             | 3.46        | 1.46E-06        | 1.84E-05                              |
| <i>GALNT15</i>  | NM_001206447             | 3.41        | 1.82E-09        | 4.80E-08                              |
| <i>DDIT4</i>    | NM_001243452             | 3.37        | 1.24E-30        | 5.59E-28                              |
| <i>VCAM1</i>    | NM_213891                | 3.35        | 6.03E-22        | 1.27E-19                              |
| <i>ZFP36</i>    | NM_001168419             | 3.32        | 7.07E-11        | 2.69E-09                              |

|                  |                               |      |          |          |
|------------------|-------------------------------|------|----------|----------|
| <i>NNAT</i>      | NM_001122990                  | 3.32 | 1.89E-04 | 1.25E-03 |
| <i>CYP4F55</i>   | NM_001244636                  | 3.31 | 8.51E-08 | 1.49E-06 |
| <i>GABARAPL1</i> | NM_001190287                  | 3.22 | 2.67E-25 | 8.43E-23 |
| <i>SLC30A2</i>   | NM_001139475                  | 3.21 | 5.60E-10 | 1.70E-08 |
| <i>STC2</i>      | NM_001110173                  | 3.15 | 2.21E-09 | 5.76E-08 |
| <i>NPPC</i>      | NM_001008482                  | 3.15 | 5.15E-05 | 4.02E-04 |
| <i>GALP</i>      | NM_001348949,<br>NM_213825    | 3.14 | 1.14E-04 | 8.03E-04 |
| <i>CPA1</i>      | NM_214244                     | 3.10 | 9.31E-06 | 9.55E-05 |
| <i>BGLAP</i>     | NM_001164004                  | 3.08 | 4.07E-06 | 4.69E-05 |
| <i>SPP1</i>      | NM_214023                     | 3.08 | 9.50E-10 | 2.68E-08 |
| <i>HSD17B1</i>   | NM_001128472                  | 3.06 | 1.60E-06 | 1.97E-05 |
| <i>DLK2</i>      | NM_001128466                  | 3.05 | 2.59E-04 | 1.64E-03 |
| <i>EIF4EBP1</i>  | NM_001244225                  | 2.99 | 9.16E-18 | 1.32E-15 |
| <i>CBLN4</i>     | NM_001123092                  | 2.98 | 2.18E-05 | 1.94E-04 |
| <i>FAAH</i>      | NM_213914                     | 2.88 | 1.20E-07 | 1.99E-06 |
| <i>PTN</i>       | NM_214336                     | 2.87 | 4.15E-06 | 4.77E-05 |
| <i>WIF1</i>      | NM_001315718                  | 2.81 | 6.24E-06 | 6.77E-05 |
| <i>CISH</i>      | NM_001315788                  | 2.79 | 2.67E-12 | 1.41E-10 |
| <i>ADM</i>       | NM_214107                     | 2.77 | 2.79E-07 | 4.22E-06 |
| <i>RTL1</i>      | NM_001134358                  | 2.75 | 2.25E-05 | 2.00E-04 |
| <i>NFKBIZ</i>    | NM_001315599                  | 2.74 | 7.49E-04 | 4.04E-03 |
| <i>RPL37</i>     | NM_001243603                  | 2.71 | 1.68E-15 | 1.48E-13 |
| <i>KLF14</i>     | NM_001134348                  | 2.71 | 3.90E-04 | 2.32E-03 |
| <i>RASGEF1B</i>  | NM_001195367                  | 2.68 | 2.48E-13 | 1.67E-11 |
| <i>CAV3</i>      | NM_001037149                  | 2.68 | 1.49E-05 | 1.41E-04 |
| <i>MYBPH</i>     | NM_001033014                  | 2.68 | 3.56E-05 | 2.96E-04 |
| <i>LHX8</i>      | NM_001166315                  | 2.67 | 8.78E-06 | 9.13E-05 |
| <i>IVNS1ABP</i>  | NM_001161649                  | 2.66 | 2.48E-11 | 1.07E-09 |
| <i>DLK1</i>      | NM_001048187,<br>NM_001126101 | 2.62 | 8.70E-08 | 1.51E-06 |
| <i>HSP70.2</i>   | NM_213766                     | 2.62 | 1.55E-04 | 1.04E-03 |
| <i>MSR1</i>      | NM_001243874                  | 2.58 | 1.92E-05 | 1.75E-04 |
| <i>SLC11A1</i>   | NM_213821                     | 2.56 | 5.16E-04 | 2.94E-03 |
| <i>TNF</i>       | NM_214022                     | 2.56 | 5.18E-03 | 1.98E-02 |
| <i>MYO7A</i>     | NM_001099928                  | 2.53 | 6.71E-04 | 3.69E-03 |
| <i>DUSP1</i>     | NM_001256075                  | 2.51 | 3.71E-09 | 8.95E-08 |
| <i>MIR24-2</i>   | NR_038538                     | 2.49 | 1.98E-03 | 9.18E-03 |
| <i>MYF5</i>      | NM_001278775                  | 2.45 | 1.41E-05 | 1.35E-04 |
| <i>ITIH3</i>     | NM_001206349                  | 2.43 | 3.11E-05 | 2.64E-04 |
| <i>LSAMP</i>     | NM_001244697                  | 2.42 | 7.12E-05 | 5.34E-04 |
| <i>AKR1CL1</i>   | NM_001038626                  | 2.41 | 2.01E-02 | 6.08E-02 |
| <i>F3</i>        | NM_213785                     | 2.40 | 2.08E-03 | 9.54E-03 |
| <i>SOCS1</i>     | NM_001204768                  | 2.40 | 1.81E-08 | 3.64E-07 |
| <i>EDN1</i>      | NM_213882                     | 2.40 | 5.93E-08 | 1.10E-06 |
| <i>RNF39</i>     | NM_001128446                  | 2.39 | 3.40E-05 | 2.85E-04 |
| <i>TGFBR3</i>    | NM_214272                     | 2.39 | 8.39E-04 | 4.41E-03 |

|                     |                                                |      |          |          |
|---------------------|------------------------------------------------|------|----------|----------|
| <i>TNC</i>          | NM_214230                                      | 2.38 | 1.58E-03 | 7.50E-03 |
| <i>LOC100514340</i> | NM_001244954                                   | 2.38 | 4.69E-04 | 2.72E-03 |
| <i>ADAMTS1</i>      | NM_001144843                                   | 2.37 | 4.59E-07 | 6.48E-06 |
| <i>SDC4</i>         | NM_214284                                      | 2.37 | 2.34E-05 | 2.06E-04 |
| <i>SMAD7</i>        | NM_001244175                                   | 2.36 | 2.64E-07 | 4.03E-06 |
| <i>PPARA</i>        | NM_001044526                                   | 2.35 | 5.36E-07 | 7.49E-06 |
| <i>LRRC2</i>        | NM_001128484                                   | 2.34 | 9.56E-07 | 1.24E-05 |
| <i>SAT1</i>         | NM_214358                                      | 2.33 | 2.54E-11 | 1.08E-09 |
| <i>KLF4</i>         | NM_001031782                                   | 2.30 | 6.89E-04 | 3.78E-03 |
| <i>PROX1</i>        | NM_001128490                                   | 2.28 | 4.83E-03 | 1.89E-02 |
| <i>TLR5</i>         | NM_001348771                                   | 2.27 | 5.19E-05 | 4.04E-04 |
| <i>MYC</i>          | NM_001005154                                   | 2.25 | 4.47E-05 | 3.58E-04 |
| <i>TNNI3</i>        | NM_001098599                                   | 2.24 | 4.62E-04 | 2.69E-03 |
| <i>RPS29</i>        | NM_001001633                                   | 2.24 | 2.39E-09 | 6.17E-08 |
| <i>LOC100511639</i> | NM_001243872,<br>NM_001243873                  | 2.24 | 9.70E-05 | 6.95E-04 |
| <i>PTGFR</i>        | NM_214059                                      | 2.22 | 1.84E-04 | 1.22E-03 |
| <i>RGCC</i>         | NM_001244227                                   | 2.22 | 1.30E-10 | 4.45E-09 |
| <i>ABCA1</i>        | NM_001317080                                   | 2.21 | 1.50E-07 | 2.46E-06 |
| <i>SLC25A36</i>     | NM_001244793                                   | 2.21 | 4.30E-08 | 8.15E-07 |
| <i>YDJC</i>         | NM_001243562                                   | 2.19 | 3.96E-08 | 7.59E-07 |
| <i>LRPAP1</i>       | NM_001113436                                   | 2.19 | 1.53E-12 | 8.50E-11 |
| <i>EDN3</i>         | NM_001098582                                   | 2.19 | 1.27E-02 | 4.19E-02 |
| <i>RPS17</i>        | NM_001001634                                   | 2.19 | 3.11E-08 | 6.11E-07 |
| <i>ACKR1</i>        | NM_001244095                                   | 2.18 | 7.66E-04 | 4.10E-03 |
| <i>XIRP1</i>        | NM_001143928                                   | 2.18 | 2.98E-06 | 3.55E-05 |
| <i>CPEB2</i>        | NM_001185049                                   | 2.17 | 4.84E-04 | 2.78E-03 |
| <i>RPL22</i>        | NM_213987                                      | 2.16 | 8.63E-10 | 2.46E-08 |
| <i>FOSL2</i>        | NM_001315740                                   | 2.16 | 3.63E-05 | 3.00E-04 |
| <i>ALB</i>          | NM_001005208                                   | 2.15 | 1.27E-02 | 4.19E-02 |
| <i>TNMD</i>         | NM_001099934                                   | 2.14 | 2.67E-03 | 1.17E-02 |
| <i>GNMT</i>         | NM_001110419                                   | 2.14 | 6.89E-08 | 1.24E-06 |
| <i>CIQTNF7</i>      | NM_001143702                                   | 2.13 | 1.99E-05 | 1.81E-04 |
| <i>ANG</i>          | NM_001044573                                   | 2.13 | 6.48E-05 | 4.90E-04 |
| <i>RAB9A</i>        | NM_001244747                                   | 2.13 | 4.00E-11 | 1.60E-09 |
| <i>ZNF217</i>       | NM_001123217                                   | 2.12 | 6.84E-06 | 7.33E-05 |
| <i>FST</i>          | NM_001003662                                   | 2.12 | 8.06E-05 | 5.91E-04 |
| <i>SGCE</i>         | NM_001144124                                   | 2.11 | 1.81E-06 | 2.22E-05 |
| <i>NFKBIA</i>       | NM_001005150                                   | 2.10 | 4.10E-03 | 1.66E-02 |
| <i>WNT4</i>         | NM_001170828                                   | 2.10 | 2.92E-07 | 4.38E-06 |
| <i>RHOF</i>         | NM_001123190                                   | 2.09 | 2.05E-03 | 9.43E-03 |
| <i>ODC1</i>         | NM_001122983                                   | 2.09 | 2.10E-04 | 1.37E-03 |
| <i>TGIF1</i>        | NM_001244288,<br>NM_001244289,<br>NM_001244290 | 2.09 | 1.08E-24 | 3.11E-22 |
| <i>HBEGF</i>        | NM_214299                                      | 2.08 | 5.26E-03 | 2.01E-02 |
| <i>DES</i>          | NM_001001535                                   | 2.08 | 2.12E-07 | 3.32E-06 |

|                 |              |      |          |          |
|-----------------|--------------|------|----------|----------|
| <i>KLF10</i>    | NM_001134344 | 2.07 | 1.07E-07 | 1.84E-06 |
| <i>NDUFA4L2</i> | NM_001205377 | 2.06 | 5.56E-03 | 2.10E-02 |
| <i>POLD2</i>    | NM_001244996 | 2.05 | 2.47E-07 | 3.80E-06 |
| <i>JAML</i>     | NM_001244730 | 2.05 | 4.03E-03 | 1.64E-02 |
| <i>IGF1R</i>    | NM_214172    | 2.04 | 1.57E-06 | 1.95E-05 |
| <i>EIF2C3</i>   | NM_001194974 | 2.01 | 3.08E-09 | 7.72E-08 |
| <i>CLK1</i>     | NM_001123099 | 2.01 | 5.94E-06 | 6.51E-05 |
| <i>RPS18</i>    | NM_213940    | 2.01 | 7.74E-05 | 5.74E-04 |
| <i>DMP1</i>     | NM_001129953 | 2.01 | 1.30E-05 | 1.26E-04 |
