# Supplementary material for: Characterization of Enlarged Tongues in Cloned Piglets
Source: MDPI journal article supplement (doi:10.3390/cimb45110571), 2023-11-14
Supplement: s1 [file s1]

**Table S4.** Downregulated DEGs between wild type and cloned piglets.

| Gene symbol    | GenBank accession number | Fold change | <i>P</i> -value | <i>FDR</i> correction <i>p</i> -value |
|----------------|--------------------------|-------------|-----------------|---------------------------------------|
| <i>OAS1</i>    | NM_214303                | -32.42      | 1.02E-53        | 3.21E-50                              |
| <i>GPD1</i>    | NM_001190240             | -15.09      | 3.97E-52        | 6.27E-49                              |
| <i>C4BPA</i>   | NM_213942                | -10.33      | 7.60E-13        | 4.53E-11                              |
| <i>LTF</i>     | NM_214362                | -8.82       | 4.00E-15        | 3.24E-13                              |
| <i>FBP2</i>    | NM_001167632             | -8.66       | 9.44E-14        | 6.48E-12                              |
| <i>INHA</i>    | NM_214189                | -7.68       | 7.71E-12        | 3.87E-10                              |
| <i>PYY</i>     | NM_001256528             | -7.08       | 4.94E-12        | 2.56E-10                              |
| <i>NPG4</i>    | NM_213863                | -6.87       | 1.62E-11        | 7.30E-10                              |
| <i>DMBT1</i>   | NM_001048188             | -6.48       | 6.95E-07        | 9.47E-06                              |
| <i>MLPH</i>    | NM_001098594             | -6.43       | 1.15E-10        | 3.98E-09                              |
| <i>PG-2</i>    | NM_001129966             | -6.07       | 3.69E-08        | 7.16E-07                              |
| <i>PGLYRP1</i> | NM_001001260             | -5.99       | 1.32E-11        | 6.21E-10                              |
| <i>PR39</i>    | NM_214450                | -5.53       | 3.17E-08        | 6.18E-07                              |
| <i>KCNS3</i>   | NM_001044596             | -5.47       | 6.91E-23        | 1.68E-20                              |
| <i>LDHA</i>    | NM_001172363             | -5.02       | 9.67E-27        | 3.82E-24                              |
| <i>CLCA1</i>   | NM_214148                | -4.81       | 2.82E-05        | 2.44E-04                              |
| <i>SNCG</i>    | NM_001103211             | -4.71       | 1.90E-17        | 2.51E-15                              |
| <i>FUT2</i>    | NM_214069                | -4.68       | 7.61E-08        | 1.35E-06                              |
| <i>NPG1</i>    | NM_001123149             | -4.63       | 1.12E-05        | 1.11E-04                              |
| <i>HP</i>      | NM_214000                | -4.55       | 2.54E-09        | 6.47E-08                              |
| <i>CRHR2</i>   | NM_001144118             | -4.44       | 6.88E-19        | 1.09E-16                              |
| <i>HBB</i>     | NM_001144841             | -4.43       | 8.45E-13        | 4.86E-11                              |
| <i>SLC9A2</i>  | NM_001100189             | -4.43       | 1.12E-19        | 2.07E-17                              |
| <i>MYH4</i>    | NM_001123141             | -4.43       | 7.28E-16        | 7.19E-14                              |
| <i>NPY1R</i>   | NM_214288                | -4.41       | 1.35E-08        | 2.82E-07                              |
| <i>TSHR</i>    | NM_214297                | -4.40       | 1.49E-08        | 3.07E-07                              |
| <i>AVPR2</i>   | NM_214232                | -4.39       | 1.61E-09        | 4.27E-08                              |
| <i>CRACR2B</i> | NM_001243838             | -4.34       | 1.10E-10        | 3.92E-09                              |
| <i>CD4</i>     | NM_001001908             | -4.25       | 4.02E-06        | 4.65E-05                              |
| <i>PMAP-23</i> | NM_001129976             | -4.25       | 2.13E-05        | 1.91E-04                              |
| <i>GNLY</i>    | NM_001278755             | -4.13       | 5.67E-09        | 1.31E-07                              |
| <i>ADRA1D</i>  | NM_001123073             | -4.02       | 1.05E-09        | 2.94E-08                              |
| <i>MPEG1</i>   | NM_001267892             | -3.85       | 8.48E-09        | 1.89E-07                              |
| <i>SLC28A3</i> | NM_001244637             | -3.81       | 5.00E-05        | 3.94E-04                              |
| <i>CCDC42</i>  | NM_001244077             | -3.77       | 1.89E-07        | 2.97E-06                              |
| <i>RSPO3</i>   | NM_001315656             | -3.77       | 1.33E-10        | 4.52E-09                              |
| <i>HTRA3</i>   | NM_001195343             | -3.74       | 1.26E-11        | 6.01E-10                              |
| <i>AQP5</i>    | NM_001110424             | -3.69       | 9.35E-05        | 6.76E-04                              |
| <i>NEFL</i>    | NM_001244331             | -3.68       | 4.45E-05        | 3.58E-04                              |
| <i>PEBP4</i>   | NM_001162888             | -3.65       | 8.61E-11        | 3.24E-09                              |
| <i>RDH16</i>   | NM_001243866             | -3.65       | 1.56E-06        | 1.94E-05                              |

|                     |              |       |          |          |
|---------------------|--------------|-------|----------|----------|
| <i>CCRL2</i>        | NM_001001617 | -3.65 | 5.05E-13 | 3.19E-11 |
| <i>BCHE</i>         | NM_001357509 | -3.61 | 1.17E-35 | 1.24E-32 |
| <i>GYS1</i>         | NM_001195508 | -3.54 | 7.95E-13 | 4.65E-11 |
| <i>KCNAB1</i>       | NM_001105294 | -3.51 | 1.21E-26 | 4.23E-24 |
| <i>CHGB</i>         | NM_214081    | -3.51 | 1.04E-05 | 1.04E-04 |
| <i>IGSF6</i>        | NM_001243387 | -3.50 | 1.95E-10 | 6.49E-09 |
| <i>MSTN</i>         | NM_214435    | -3.50 | 8.35E-05 | 6.10E-04 |
| <i>MTTP</i>         | NM_214185    | -3.49 | 4.08E-05 | 3.31E-04 |
| <i>OAS2</i>         | NM_001031796 | -3.46 | 6.64E-10 | 1.95E-08 |
| <i>PII6</i>         | NM_001243527 | -3.46 | 8.54E-10 | 2.45E-08 |
| <i>LOC100513601</i> | NM_001246242 | -3.44 | 8.73E-04 | 4.56E-03 |
| <i>NCEH1</i>        | NM_001243484 | -3.40 | 3.04E-10 | 9.81E-09 |
| <i>PFKM</i>         | NM_001044550 | -3.38 | 6.36E-11 | 2.51E-09 |
| <i>FADS1</i>        | NM_001113041 | -3.34 | 4.55E-16 | 4.79E-14 |
| <i>MT3</i>          | NM_214056    | -3.33 | 2.20E-05 | 1.96E-04 |
| <i>SLA-DRB1</i>     | NM_001113695 | -3.33 | 2.87E-10 | 9.35E-09 |
| <i>CASQ1</i>        | NM_001243269 | -3.31 | 6.14E-13 | 3.73E-11 |
| <i>HOMER1</i>       | NM_001243811 | -3.30 | 3.11E-10 | 9.93E-09 |
| <i>SYN1</i>         | NM_001141988 | -3.29 | 1.99E-14 | 1.43E-12 |
| <i>GOS2</i>         | NM_001286804 | -3.24 | 2.26E-19 | 3.77E-17 |
| <i>ACY1</i>         | NM_213896    | -3.22 | 1.13E-18 | 1.70E-16 |
| <i>AOX1</i>         | NM_001308473 | -3.17 | 2.71E-04 | 1.70E-03 |
| <i>KRT8</i>         | NM_001159615 | -3.15 | 8.61E-07 | 1.14E-05 |
| <i>MYOC</i>         | NM_213986    | -3.13 | 1.05E-08 | 2.23E-07 |
| <i>TMOD4</i>        | NM_001243294 | -3.12 | 9.95E-09 | 2.14E-07 |
| <i>PLBD1</i>        | NM_001244629 | -3.09 | 3.32E-09 | 8.18E-08 |
| <i>METTL11B</i>     | NM_001243649 | -3.08 | 6.75E-05 | 5.09E-04 |
| <i>AQP7</i>         | NM_001113438 | -3.06 | 1.22E-09 | 3.32E-08 |
| <i>SCIN</i>         | NM_001244731 | -3.03 | 2.45E-04 | 1.56E-03 |
| <i>GALNT16</i>      | NM_001244918 | -3.02 | 1.70E-10 | 5.70E-09 |
| <i>MYL3</i>         | NM_001278773 | -3.01 | 4.66E-04 | 2.71E-03 |
| <i>AQP11</i>        | NM_001112682 | -3.00 | 2.87E-07 | 4.32E-06 |
| <i>TFRC</i>         | NM_214001    | -2.99 | 1.21E-14 | 9.08E-13 |
| <i>LHB</i>          | NM_214080    | -2.98 | 1.01E-05 | 1.02E-04 |
| <i>C13H21orf62</i>  | NM_001163696 | -2.98 | 4.00E-10 | 1.23E-08 |
| <i>RGS5</i>         | NM_214356    | -2.98 | 4.07E-13 | 2.68E-11 |
| <i>EGF</i>          | NM_214020    | -2.97 | 9.92E-09 | 2.14E-07 |
| <i>OBP2B</i>        | NM_213856    | -2.97 | 3.85E-04 | 2.30E-03 |
| <i>CCL19</i>        | NM_001170516 | -2.96 | 3.69E-05 | 3.04E-04 |
| <i>SLC37A4</i>      | NM_001199719 | -2.94 | 2.84E-15 | 2.36E-13 |
| <i>GGT1</i>         | NM_214030    | -2.92 | 7.72E-05 | 5.74E-04 |
| <i>GPI</i>          | NM_214330    | -2.92 | 2.30E-11 | 1.02E-09 |
| <i>AMPD1</i>        | NM_001123076 | -2.92 | 2.56E-15 | 2.19E-13 |
| <i>CNN1</i>         | NM_213878    | -2.92 | 3.78E-06 | 4.40E-05 |
| <i>ADAP2</i>        | NM_001195323 | -2.91 | 6.46E-10 | 1.93E-08 |
| <i>RHCE</i>         | NM_214378    | -2.89 | 3.44E-04 | 2.08E-03 |

|                 |              |       |          |          |
|-----------------|--------------|-------|----------|----------|
| <i>TDRD10</i>   | NM_001246198 | -2.89 | 2.42E-08 | 4.77E-07 |
| <i>TCF19</i>    | NM_001167591 | -2.86 | 3.67E-10 | 1.15E-08 |
| <i>FITM2</i>    | NM_001128460 | -2.85 | 1.70E-07 | 2.74E-06 |
| <i>CKMT2</i>    | NM_001044551 | -2.84 | 5.68E-06 | 6.37E-05 |
| <i>GP9</i>      | NM_001141989 | -2.84 | 5.10E-05 | 4.00E-04 |
| <i>FCN2</i>     | NM_213868    | -2.81 | 4.57E-07 | 6.48E-06 |
| <i>PGM1</i>     | NM_001246318 | -2.80 | 2.55E-12 | 1.37E-10 |
| <i>CAMK2G</i>   | NM_214193    | -2.78 | 3.89E-22 | 8.77E-20 |
| <i>PGK1</i>     | NM_001099932 | -2.78 | 1.68E-17 | 2.31E-15 |
| <i>STARD4</i>   | NM_001143726 | -2.74 | 3.08E-03 | 1.33E-02 |
| <i>CREB3L4</i>  | NM_001123102 | -2.74 | 3.04E-06 | 3.61E-05 |
| <i>ATP2A2</i>   | NM_213865    | -2.72 | 5.37E-12 | 2.74E-10 |
| <i>MARCH2</i>   | NM_001244915 | -2.71 | 3.44E-09 | 8.44E-08 |
| <i>AQP1</i>     | NM_214454    | -2.66 | 1.76E-07 | 2.78E-06 |
| <i>TPI1</i>     | NM_001037151 | -2.65 | 1.66E-14 | 1.22E-12 |
| <i>TMEM106A</i> | NM_001244554 | -2.63 | 6.66E-11 | 2.57E-09 |
| <i>PHKG1</i>    | NM_001293144 | -2.61 | 4.76E-09 | 1.11E-07 |
| <i>ATP2A1</i>   | NM_001204393 | -2.58 | 4.01E-09 | 9.47E-08 |
| <i>CALML4</i>   | NM_001244619 | -2.56 | 3.96E-06 | 4.60E-05 |
| <i>NTF4</i>     | NM_001243713 | -2.56 | 5.72E-09 | 1.31E-07 |
| <i>BCAS1</i>    | NM_001110175 | -2.55 | 6.89E-06 | 7.36E-05 |
| <i>CEND1</i>    | NM_213866    | -2.54 | 1.63E-04 | 1.09E-03 |
| <i>CLGN</i>     | NM_001243207 | -2.52 | 1.54E-03 | 7.36E-03 |
| <i>CACNG1</i>   | NM_001044605 | -2.51 | 1.44E-05 | 1.37E-04 |
| <i>PRKAB2</i>   | NM_001243683 | -2.50 | 2.32E-11 | 1.02E-09 |
| <i>FLVCR1</i>   | NM_001142846 | -2.49 | 5.04E-07 | 7.08E-06 |
| <i>CLIC5</i>    | NM_001198923 | -2.48 | 3.55E-11 | 1.44E-09 |
| <i>SEC14L2</i>  | NM_001198918 | -2.48 | 1.09E-03 | 5.48E-03 |
| <i>FBP1</i>     | NM_213979    | -2.46 | 1.40E-03 | 6.83E-03 |
| <i>HYAL1</i>    | NM_214441    | -2.43 | 9.74E-05 | 6.97E-04 |
| <i>TBC1D10B</i> | NM_001244423 | -2.41 | 1.19E-11 | 5.88E-10 |
| <i>AKR1B1</i>   | NM_001001539 | -2.39 | 5.66E-10 | 1.70E-08 |
| <i>PDYN</i>     | NM_001004040 | -2.38 | 6.22E-04 | 3.47E-03 |
| <i>PHYHIPL</i>  | NM_001244581 | -2.37 | 3.38E-03 | 1.43E-02 |
| <i>SLA-1</i>    | NM_001097431 | -2.34 | 3.82E-04 | 2.28E-03 |
| <i>ATP6V1A</i>  | NM_001004042 | -2.34 | 7.98E-08 | 1.40E-06 |
| <i>ENO3</i>     | NM_001044527 | -2.34 | 1.19E-07 | 1.98E-06 |
| <i>IFITM3</i>   | NM_001201382 | -2.34 | 1.26E-02 | 4.18E-02 |
| <i>MUC4</i>     | NM_001206344 | -2.32 | 2.81E-02 | 7.91E-02 |
| <i>ITGB1BP2</i> | NM_001033009 | -2.32 | 7.62E-09 | 1.71E-07 |
| <i>CYP2B22</i>  | NM_214413    | -2.31 | 7.98E-04 | 4.24E-03 |
| <i>RNASEL</i>   | NM_001097512 | -2.31 | 2.27E-03 | 1.03E-02 |
| <i>MYH1</i>     | NM_001104951 | -2.30 | 2.06E-05 | 1.86E-04 |
| <i>P2RY11</i>   | NM_001204436 | -2.29 | 6.97E-04 | 3.81E-03 |
| <i>ARHGDIB</i>  | NM_001244240 | -2.29 | 1.31E-09 | 3.53E-08 |
| <i>OLR1</i>     | NM_213805    | -2.27 | 7.63E-03 | 2.76E-02 |

|                  |              |       |          |          |
|------------------|--------------|-------|----------|----------|
| <i>RBP1</i>      | NM_001031789 | -2.23 | 3.35E-03 | 1.42E-02 |
| <i>CYSLTR2</i>   | NM_214130    | -2.20 | 4.74E-06 | 5.39E-05 |
| <i>CLDN10</i>    | NM_001243444 | -2.20 | 5.80E-04 | 3.28E-03 |
| <i>KCNJ2</i>     | NM_214151    | -2.19 | 4.41E-05 | 3.56E-04 |
| <i>GFAP</i>      | NM_001244397 | -2.19 | 4.37E-03 | 1.75E-02 |
| <i>CACNA2D1</i>  | NM_214183    | -2.19 | 5.13E-04 | 2.93E-03 |
| <i>LOC733579</i> | NM_001044532 | -2.18 | 1.07E-06 | 1.38E-05 |
| <i>TLR6</i>      | NM_213760    | -2.18 | 2.40E-09 | 6.17E-08 |
| <i>IL34</i>      | NM_001285975 | -2.18 | 4.48E-05 | 3.59E-04 |
| <i>TOB1</i>      | NM_001123205 | -2.17 | 9.84E-09 | 2.14E-07 |
| <i>IFITM2</i>    | NM_001246214 | -2.17 | 9.31E-09 | 2.06E-07 |
| <i>CCND2</i>     | NM_214088    | -2.15 | 3.88E-09 | 9.21E-08 |
| <i>IGFBP7</i>    | NM_001163801 | -2.15 | 1.68E-08 | 3.40E-07 |
| <i>ANKRD23</i>   | NM_001315720 | -2.15 | 1.18E-04 | 8.27E-04 |
| <i>SALI</i>      | NM_213814    | -2.15 | 2.74E-02 | 7.80E-02 |
| <i>MYL9</i>      | NM_001244472 | -2.14 | 9.90E-06 | 1.01E-04 |
| <i>AKR1C4</i>    | NM_001123075 | -2.14 | 4.54E-02 | 1.14E-01 |
| <i>SLC31A1</i>   | NM_214100    | -2.14 | 4.14E-07 | 5.95E-06 |
| <i>ALDH5A1</i>   | NM_001244467 | -2.13 | 5.56E-07 | 7.74E-06 |
| <i>HMGCS1</i>    | NM_001252215 | -2.13 | 1.37E-02 | 4.44E-02 |
| <i>RAD54L</i>    | NM_001123183 | -2.12 | 6.53E-07 | 8.93E-06 |
| <i>ARF2</i>      | NM_001145220 | -2.12 | 5.58E-14 | 3.92E-12 |
| <i>TRIM26</i>    | NM_001123209 | -2.12 | 1.46E-06 | 1.84E-05 |
| <i>ATP5F1A</i>   | NM_001185142 | -2.11 | 1.39E-08 | 2.89E-07 |
| <i>SLC16A1</i>   | NM_001128445 | -2.11 | 8.81E-07 | 1.17E-05 |
| <i>ORAI1</i>     | NM_001173519 | -2.11 | 8.54E-15 | 6.58E-13 |
| <i>HSPA8</i>     | NM_001243907 | -2.11 | 7.33E-10 | 2.12E-08 |
| <i>CYP7A1</i>    | NM_001005352 | -2.10 | 3.52E-03 | 1.47E-02 |
| <i>CA4</i>       | NM_001243920 | -2.09 | 5.98E-04 | 3.36E-03 |
| <i>GOT2</i>      | NM_213928    | -2.09 | 1.14E-10 | 3.98E-09 |
| <i>SLPI</i>      | NM_213870    | -2.09 | 1.94E-03 | 9.03E-03 |
| <i>NLRC5</i>     | NM_001278781 | -2.09 | 3.62E-04 | 2.17E-03 |
| <i>HTR2B</i>     | NM_001164019 | -2.09 | 1.09E-03 | 5.48E-03 |
| <i>MAOB</i>      | NM_001001864 | -2.09 | 1.15E-02 | 3.90E-02 |
| <i>DNAJC6</i>    | NM_001145378 | -2.08 | 8.39E-04 | 4.41E-03 |
| <i>LCK</i>       | NM_001143713 | -2.08 | 7.41E-04 | 4.01E-03 |
| <i>SERTM2</i>    | NM_001354500 | -2.07 | 7.88E-05 | 5.80E-04 |
| <i>ZC3HAV1</i>   | NM_001177489 | -2.07 | 1.75E-07 | 2.78E-06 |
| <i>PTHLH</i>     | NM_213916    | -2.07 | 1.60E-02 | 5.00E-02 |
| <i>B4GALNT2</i>  | NM_001244330 | -2.07 | 4.01E-05 | 3.26E-04 |
| <i>IMPA1</i>     | NM_214216    | -2.06 | 1.09E-09 | 3.02E-08 |
| <i>GOT1</i>      | NM_213927    | -2.06 | 3.30E-05 | 2.78E-04 |
| <i>TAP1</i>      | NM_001044581 | -2.06 | 5.02E-13 | 3.19E-11 |
| <i>SLC6A6</i>    | NM_001319102 | -2.06 | 1.92E-03 | 8.98E-03 |
| <i>MLLT11</i>    | NM_001244607 | -2.06 | 9.70E-06 | 9.90E-05 |
| <i>GAL3ST1</i>   | NM_001244429 | -2.05 | 3.98E-03 | 1.63E-02 |

|                     |              |       |          |          |
|---------------------|--------------|-------|----------|----------|
| <i>KAZALD1</i>      | NM_001244551 | -2.04 | 1.25E-04 | 8.63E-04 |
| <i>RETN</i>         | NM_213783    | -2.04 | 3.28E-02 | 8.97E-02 |
| <i>TF</i>           | NM_001244653 | -2.03 | 1.83E-02 | 5.61E-02 |
| <i>PRKG1</i>        | NM_001044574 | -2.03 | 1.69E-03 | 8.01E-03 |
| <i>SLC26A6</i>      | NM_001012298 | -2.03 | 3.46E-05 | 2.87E-04 |
| <i>MGST1</i>        | NM_214300    | -2.03 | 3.16E-09 | 7.86E-08 |
| <i>ITGB6</i>        | NM_001097423 | -2.02 | 6.67E-04 | 3.68E-03 |
| <i>PSMB9</i>        | NM_001037961 | -2.02 | 1.45E-08 | 3.00E-07 |
| <i>HMGCR</i>        | NM_001122988 | -2.02 | 8.55E-03 | 3.04E-02 |
| <i>B3GNT5</i>       | NM_214327    | -2.02 | 6.57E-04 | 3.63E-03 |
| <i>CD247</i>        | NM_214155    | -2.02 | 3.96E-08 | 7.59E-07 |
| <i>HAAO</i>         | NM_001244941 | -2.02 | 4.64E-05 | 3.68E-04 |
| <i>LOC100153094</i> | NM_001315568 | -2.02 | 1.16E-05 | 1.14E-04 |
| <i>UGT8</i>         | NM_001315662 | -2.01 | 4.38E-03 | 1.75E-02 |
| <i>SUV39H2</i>      | NM_001039747 | -2.01 | 3.11E-07 | 4.64E-06 |
| <i>NFE2</i>         | NM_001185152 | -2.00 | 2.06E-04 | 1.34E-03 |
| <i>SELENOT</i>      | NM_001163408 | -2.00 | 1.56E-08 | 3.18E-07 |
| <i>MMD</i>          | NM_001044595 | -2.00 | 1.75E-05 | 1.61E-04 |
