# Supplementary material for: Characterization of Enlarged Tongues in Cloned Piglets
Source: MDPI journal article supplement (doi:10.3390/cimb45110571), 2023-11-14
Supplement: s1 [file s1]

**Table S5.** Analysis of enriched biological process GO Terms for DEGs.

| GO term    | Description                                                               | Fold change | enrichment FDR |
|------------|---------------------------------------------------------------------------|-------------|----------------|
| GO:0003012 | Muscle system process                                                     | 6.20        | 4.25E-08       |
| GO:0048878 | Chemical homeostasis                                                      | 3.90        | 3.01E-10       |
| GO:0051241 | Negative regulation of multicellular organismal proc.                     | 3.44        | 2.72E-07       |
| GO:0051707 | Response to other organism                                                | 3.39        | 9.14E-08       |
| GO:0043207 | Response to external biotic stimulus                                      | 3.39        | 9.14E-08       |
| GO:1901700 | Response to oxygen-containing compound                                    | 3.16        | 9.98E-08       |
| GO:0044419 | Biological process involved in interspecies interaction between organisms | 3.14        | 1.79E-07       |
| GO:0042592 | Homeostatic process                                                       | 3.12        | 4.49E-10       |
| GO:0051239 | Reg. of multicellular organismal process                                  | 3.07        | 4.66E-16       |
| GO:0009605 | Response to external stimulus                                             | 2.97        | 2.55E-12       |
| GO:0009888 | Tissue development                                                        | 2.79        | 1.27E-08       |
| GO:0032879 | Reg. of localization                                                      | 2.76        | 7.29E-12       |
| GO:0070887 | Cellular response to chemical stimulus                                    | 2.63        | 3.52E-11       |
| GO:0016310 | Phosphorylation                                                           | 2.56        | 2.72E-07       |
| GO:0002376 | Immune system process                                                     | 2.53        | 6.87E-09       |
| GO:0071310 | Cellular response to organic substance                                    | 2.51        | 1.24E-07       |
| GO:0065009 | Regulation of molecular function                                          | 2.43        | 7.05E-08       |
| GO:0010033 | Response to organic substance                                             | 2.39        | 5.24E-08       |
| GO:0035556 | Intracellular signal transduction                                         | 2.33        | 3.11E-07       |
